# Supplementary material for: Chronic Wasting Disease Drives Population Decline of White-Tailed Deer
Source: PLoS One. 2016 Aug 30;11(8):e0161127. doi: 10.1371/journal.pone.0161127 (PMC5004924; doi:10.1371/journal.pone.0161127)
Supplement: S4 Table — (XLSX) [file pone.0161127.s005.xlsx]

## Sheet: Sheet1
Record	ID	Fawns	CWD	Age	Calendar_Year
1	A29	1	Neg	8	2008
2	A38	1	Neg	13	2008
3	A40	0	Neg	6	2008
4	F01	0	Neg	6	2008
5	F27	0	Neg	5	2008
6	F31	0	Neg	5	2008
7	F34	0	Neg	5	2008
8	F42	0	Neg	5	2008
9	F62	0	Neg	4	2008
10	F66	1	Pos	4	2008
11	F71	0	Pos	4	2008
12	F76	2	Neg	4	2008
13	F78	1	Neg	4	2008
14	F82	1	Neg	4	2008
15	F83	1	Pos	4	2008
16	F93	0	Neg	3	2008
17	F100	1	Neg	3	2008
18	F103	0	Neg	3	2008
19	F106	2	Neg	3	2008
20	A29	1	Neg	9	2009
21	A38	2	Neg	14	2009
22	A62	0	Neg	2	2009
23	A63	1	Neg	4	2009
24	F27	1	Pos	6	2009
25	F31	1	Neg	6	2009
26	F62	1	Pos	5	2009
27	F73	1	Pos	4	2009
28	F76	0	Neg	5	2009
29	F78	0	Neg	5	2009
30	F83	0	Pos	5	2009
31	F93	2	Neg	4	2009
32	F100	0	Neg	4	2009
33	F103	2	Neg	4	2009
34	F106	2	Pos	4	2009
